## RESEARCH ARTICLE

# Predictors of relapse of acute malnutrition following exit from community-based management program in Amhara region, Northwest Ethiopia: An unmatched case-control study

Dereje Birhanu Abitew<sup>1\*</sup>, Alemayehu Worku Yalew<sup>1</sup>, Afework Mulugeta Bezabih<sup>2</sup>, Alessandra N. Bazzano<sup>3</sup>

**1** School of Public Health, Addis Ababa University, Addis Ababa, Ethiopia, **2** School of Public Health, Mekelle University, Mekele, Ethiopia, **3** Department of Global Community Health and Behavioral Sciences, School of Public Health and Tropical Medicine, Tulane University, New Orleans, LA, United States of America

\* [derejefrae2014@gmail.com](mailto:derejefrae2014@gmail.com)

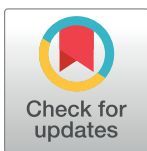

## OPEN ACCESS

**Citation:** Abitew DB, Yalew AW, Bezabih AM, Bazzano AN (2020) Predictors of relapse of acute malnutrition following exit from community-based management program in Amhara region, Northwest Ethiopia: An unmatched case-control study. *PLoS ONE* 15(4): e0231524. <https://doi.org/10.1371/journal.pone.0231524>

**Editor:** Denise Evans, University of the Witwatersrand, SOUTH AFRICA

**Received:** May 5, 2019

**Accepted:** March 25, 2020

**Published:** April 22, 2020

**Copyright:** © 2020 Abitew et al. This is an open access article distributed under the terms of the [Creative Commons Attribution License](https://creativecommons.org/licenses/by/4.0/), which permits unrestricted use, distribution, and reproduction in any medium, provided the original author and source are credited.

**Data Availability Statement:** All relevant data are within the paper and its Supporting Information files.

**Funding:** This study was funded by Addis Ababa University, School of Public Health who provide money for data collection but the funder had no role in study design, data collection and analysis, decision to publish, or preparation of the manuscript.

## Abstract

### Background

Community-based management of acute malnutrition (CMAM) is an effective program to manage children with acute malnutrition, including both severe and moderate acute malnutrition. However, little is known about continued child nutritional status after discharge from community based management of acute malnutrition programs in Ethiopia.

### Objective

The study aimed to identify factors associated with relapse of acute malnutrition among children 6–59 months after been discharged recovered from community based management program in South Gondar Zone, Northwest Ethiopia.

### Methods

A case-control study was conducted in three districts of South Gondar Zone by tracing children age 6–59 months who were reported as recovered from the community based management program. Sample size calculated for the first objective of assessing prevalence of severe acute malnutrition among children following discharge as recovery using Epi- Info version 7.1.3.3 StatCalc taking 95% CL, 17.8% post discharge relapse (Ashraf H, et al. (2012), 3% margin of error, design effect of 2 and adding 5% non-response rate was the largest sample size and used to this study.

Children with Mid Upper Arm Circumference (MUAC) <12.5cm constituted cases and children with ≥ 12.5cm served as controls. Data were collected from 10 November 2017 to 30 January 2018 using a survey questionnaire and families were asked to bring children to a health facility for anthropometric measurements, following which data were entered and

**Competing interests:** No authors have competing interests

analyzed. Bivariate and multivariable logistic regression models were utilized to measure association between the risk factors and acute malnutrition.

## Results

Overall, 1,273 participants were interviewed. The mean age in months of children was 23.1 ( $\pm 9.1$  SD) for cases and 23.1 ( $\pm 8.9$  SD) for controls. About 40% of the cases and 50% of the controls were female children. The factors associated with acute malnutrition were: male children (AOR = 1.84, 95% CI: 1.42–2.39), living in a food insecure household (AOR = 1.67, 95% CI: 1.15–2.44), non-receipt of Vitamin A supplement (AOR = 1.76, 95% CI: 1.28–2.41), prelacteal feeding (AOR = 2.81 (95%CI, 1.57–5.05), distance to water source more than 15 walk (AOR = 1.88, 95% CI: 1.32–2.71), less frequent self-reported hand washing (AOR = 1.35, 95% CI: 1.05–1.75), mother not having consumed extra food during this pregnancy/lactation (AOR = 1.36, 95% CI: 1.03–1.78), and respondent age above 30 years (AOR = 1.43, 95% CI: 1.10–1.87).

## Conclusion

The key factors contributing to relapse of acute malnutrition were related to childcare and feeding practices. Social and behavior change communication strategies targeting families at risk of undernutrition, along with improved food security and integrated programming are recommended to prevent relapse of acute malnutrition.

## Introduction

### Background

Under-nutrition results from reductions in food intake or diet quality and is often combined with pathological causes [1, 2] and may be categorized as either chronic or acute malnutrition [3]. Acute malnutrition or wasting is further classified as moderate acute malnutrition (MAM) or severe acute malnutrition (SAM) based on the degree of malnutrition and the presence of edema [3, 4]. According to a 2018 report, globally over 49 million children under 5 have acute malnutrition and nearly 17 million were classified as severely wasted [5]. The magnitude of acute malnutrition nationally and in the Amhara region was found to be 10% [6]. It is not only the magnitude of undernutrition, but also subsequent health consequences that are important, as children suffering from acute malnutrition have weakened immunity and face an increased risk of death, particularly when wasting is severe [5]. The mortality rate among children with SAM is 5–20 times higher than among well-nourished children [3,7]. Globally about 1 million children die every year from SAM [2, 8] and in Ethiopia about 57% of all under-five deaths are related to malnutrition, of which three-quarters are related to mild to moderate malnutrition [9]. It is also estimated that about 70% of all childhood mortality in developing countries is due to five major conditions, and for these, malnutrition increases the likelihood of mortality up to 56% [2]. Ten high-impact, nutrition-specific interventions have been identified that, if taken as a package up to 90 percent coverage, could reduce wasting by 60 percent. Among these important interventions is the management of SAM and MAM [10]. Children with

uncomplicated SAM (WHZ below -3 SD cut-off and/or with MUAC cut-off of 11.5 cm and/or with bilateral edema) and MAM (WHZ between -2 and -3 or mid-upper arm circumference (MUAC) between 11–5 and 12.5 centimeters) may be treated in the community setting with special therapeutic foods without requiring admission to a health facility, referred to as Community based Management of Acute Malnutrition (CMAM) program [11, 12]. The most common therapeutic regimens are based on severity and include a short course of basic oral medications to treat infections [3].

Children diagnosed with SAM are discharged recovered from the program when their weight-for-height/length is  $\geq -2$  Z-score and they have had no oedema for at least 2 weeks or alternatively if their mid-upper-arm circumference is  $\geq 12.5$  cm and they have had no oedema for at least 2 weeks. In addition, children admitted with only bilateral pitting oedema are discharged recovered based on the anthropometric indicator routinely used in local programmes [4] which in the Ethiopian context, is when their  $W/L > = 85\%$  or  $W/H > = 85\%$  on more than one occasion (two days for in-patients, two weeks for out-patients) and they have had no oedema for 10 days (as an in-patient) or 14 days (as an out-patient) and/or, when target weight gain has been reached and they have had no oedema for 10 days (as an in-patient) or 14 days (as an out-patient) as the second option [13].

The CMAM program has been reported to be effective in terms of access and key performance indicators (recovery, default, and death rates) [7, 14]. In some research findings, the recovery rate has been reported to be above the Sphere Handbook [15] minimum standard of  $>75\%$  [16–19], but the relapse rate of acute malnutrition (both SAM and MAM) after discharge as recovered is high. This has been noted as 78% as in Bangladesh (69% MAM & 9% SAM) [20], 27% (10% SAM & 17% MAM) [21], and in Southern Ethiopia 72.1% (34.6% SAM & 37.5% MAM) [22]. Some studies [21, 23–25] have investigated the factors specifically associated with relapse of acute malnutrition after been discharged recovered, but none thus far have emanated from Ethiopia as a whole, or the Amhara region in particular. The objective of the study was therefore to identify the factors related to relapse of acute malnutrition following successful recovery through community-based management of acute malnutrition (CMAM) program in the previous one year in Northwest Ethiopia.

## Materials and methods

### Study area

The study was conducted in South Gondar Zone of Amhara region, Ethiopia. South Gondar Zone is one of the 11 administrative zones of Amhara region, Ethiopia. Debretabor is the capital city of the zone situated about 100 Km East of Bahir Dar (the capital city of Amhara Region) and 667 Km North of Addis Ababa (the capital city of Ethiopia). The Zone has 17 districts, five of which are town administrations namely Debretabor, Woreta, Mekane Eyesus, Addis Zemen, and Nefas-Mewcha. According to the Government of Ethiopia, the 2017/18 population of the Zone was 2,484,929 of which 183, 525 were children 0-4yrs old [26]. In South Gondar, there was one Zonal hospital and three district hospitals, 90 Health Centers, 378 Health Posts, and more than 10 private clinics. According to the Zonal health department annual report, 68% of children under two years of age had participated in a growth monitoring program, and a total of 6,468 SAM children were managed in the health facilities with an overall 96.8% recovery rate [27]. Regarding to the topography of the randomly selected districts, Tach-Gayint is one of the highland and mountainous districts in the Zone next to Lay-Gayint, while Ebnat is lowland but has hilly places, however all three districts are drought-prone, rural and land degraded.

## Study design and population

An unmatched case-control study was conducted from 10 November 2017 to 30 January 2018. The source populations were 6–59 months old children discharged as recovered from CMAM program in South Gondar Zone and the study populations were those children age 6–59 months following discharge as recovered in the randomly selected district of South Gondar Zone, Amhara region, Ethiopia.

## Definition of cases and controls

Case and control children were identified from those discharged as recovered after their mid upper arm circumference (MUAC) was taken and edema was assessed.

Case: a child was considered as case, if he/she had MUAC  $< 12.5$ cm (both acute and severe acute malnutrition) and/or presence of bilateral edema) after being successfully discharged recovered from CMAM program.

Control: a child was considered as control, if he/she has MUAC  $\geq 12.5$ cm and/or with no bilateral edema after being successfully discharged recovered from CMAM program.

## Inclusion and exclusion criteria

**Inclusion criteria.** Children 6 to 59 months old who were discharged recovered from CMAM program.

**Exclusion criteria.** Children were excluded if their name was different from the name present in the CMAM registration logbook. In addition, children with chronic illnesses such as cerebral palsy or congenital malformations were also excluded.

*Sample size determination and sampling procedure.* Sample size was calculated using Epi-Info version 7.1.3.3 StatCalc with 95% CL, 80% power, 1:2 case to control ratio, with child vaccination status as the main exposure (19.3% incomplete vaccination status and AOR = 1.89) [24], a design effect of two, and considering 10% non-response rate. The calculated sample size for the study was 1,103 (368 cases and 735), but as this was part of a large study, the final sample size of 1290 was used to increase the precision, resulting in 430 cases and 860 controls.

Regarding the sampling procedure, a two stage sampling technique was used. Among the 17 districts of South Gondar Zone, 12 were rural administrative districts and from these rural districts, 3 districts (Ebnat, Tach-Gayint, and Lay-Gayint) were selected randomly using a lottery method within which, 10 health centers were selected randomly (129 discharged recovered children per health Centre). In the current Ethiopian health system, a health Centre has 5 cluster health posts in its catchment area and we considered 3–5 health posts per health Centre based on reported caseload, therefore 26–43 discharged recovered children were identified per health post using the one-year therapeutic multi-chart logbook (from November 2016 to October Oct 2017) as a sampling frame. Finally, through these identification procedure, parents were contacted by Health Extension Workers (HEWs) and asked to bring children to the health post for survey data collection, to measure their mid upper arm circumference and to examine them for bilateral oedema according to anthropometric standards.

Children's vaccination status was checked by looking at their immunization card and if not available, mothers were asked to recall if the child was vaccinated in as much detail as possible especially the last vaccination when they told by health professionals that the child has now completed his/her vaccination to know indirectly for measles vaccination and Bacillus Chalmette Guerin (BCG) vaccination for tuberculosis was also checked if any scar existed on a child's arm.

## Study variables

The outcome variable was relapse of acute malnutrition after discharged as recovered from the CMAM program in South Gondar Zone, Amhara region, Ethiopia.

Independent variables included socio-economic status, demographic data, household hygiene/sanitation, awareness of recommended caring and feeding practices for children, health facility access, and household food security.

## Data collection tools and measurements

The data collection tools used consisted of a checklist and questionnaire. The checklist was prepared using the stabilization Centre/outpatient therapeutic program (SC/OTP) multi-chart and registration logbook which are utilized throughout the country [13, 28] to identify and trace discharged recovered children. In addition, the questionnaire used for this study was adapted from validated locally used questionnaires in nutrition research and survey reports. For example questions and potential responses regarding socio-demographic/economic, housing conditions, child feeding/caring and related items were developed from the Ethiopian Demographic and Health Survey reports [29].

In addition, the questions to assess HH food security status were taken from a validated questionnaire developed by Food and Nutrition Technical Assistant (FANTA) project [30]. For further validation, prior to data collection, the questionnaires were pre-tested on 5% of actual respondents in another health facility (Health Post) outside of the study area to check for understandability and clarity, and appropriate corrections were made based on the pre-test results.

The questionnaire was prepared in English and then translated to the local language (Amharic) and back to English to check the consistency. Mothers or primary caretakers were interviewed using the questionnaire which took approximately 20–30 minutes. The data collection took place from 10 November 2017 to 30 January 2018. A total of 15 data collectors who had SAM management training and relevant previous experience in data collection were recruited and trained for 2 days, with training content mainly focusing on anthropometric measurement techniques and on how to administer the questionnaire [3, 28]. The data collectors were closely supervised by the 3 trained health professionals and by the principal investigator.

## Anthropometric measurements

Child MUAC was measured halfway between the olecranon and acromion process using non-stretchable tape snugly at the midpoint according to the standard and tape was checked as not pulled too tight or too loose and recorded to the nearest 0.1 cm. In addition, presence of edema was assessed by grasping both feet in the hands with the thumbs on top of the feet and then pressing the thumbs gently for three seconds or a count of 101, 102, 103 and then releasing the thumbs. It was recorded as “0” if no pitting was detected on the feet, recorded as “+” if an indent was detected on feet, “++” if on legs and feet, and “+++” if it included the hands and face according to accepted standards [3, 13].

To assure data quality, data collectors and supervisors were trained for 2 consecutive days on anthropometric measurement techniques [13, 28] and were also closely supervised by supervisors and investigators. Pre-testing took place in a health post from a non-study district similar to the study sites.

## Operational definitions/definition of terms

Relapse: a child was considered as a relapsed case, if he/she had MUAC <12.5cm (both SAM and MAM) and/or presence of bilateral edema after having been successfully discharged recovered from CMAM [3, 13], "Cases therefore included children who had relapsed to MAM or SAM, while controls were those who had maintained MUAC >12.5cm in the previous one year.

A respondent was categorized as having good hand washing practice if they reported washing hands at 3 or more of the recommended critical times/points (before eating, before preparing food, after defecation, and after cleaning child's bottom).

A household was considered to have improved drinking water if the source was either from a pipe, protected spring, protected well and/or boiled water.

A respondent was considered as currently on family planning if she reported using any family planning methods currently to avoid pregnancy or extend the interval between births.

Household food insecurity status was determined using the 9 item Household Food Insecurity Access Scale (HFIA) question. and Prior to assigning the food insecurity category (access), each frequency of occurrence responses was coded as 0 for all cases where the answer to the corresponding occurrence question was "no" and then the four food security categories were computed and created sequentially as recommended by FANTA [30]. Finally, the HFIA category 1 was considered as food secure and the remaining as food insecure.

## Data management and analysis

The questionnaire was checked manually for completeness and was entered into EpiData version 3.3.2, and exported to SPSS version 20 for analysis. Data cleaning was done using frequency distribution. Anthropometric indices were generated according to the WHO's 2006 Child Growth Standards [31] using WHO Anthro software 3.2.2.

Bivariate and multivariable binary logistic regression was employed to identify predictors of acute malnutrition after children were discharged as recovered from CMAM program and those attributable variables with P value <0.05 were entered in to the final multivariate binary logistic regression model. Variables in the final model with P value <0.05 were declared statistically significant.

Strength of association was determined using the odds ratio with 95% CIs. The final model was tested for model goodness of fit using Hosmer Lemeshow test. The standard error (SE) values of variables in the final model were checked for multicollinearity. Mean and standard deviation were used for continuous variables, and frequency and percentages for categorical variables when analyzing.

## Ethical review

The protocol and consent form was approved by the institutional review board (IRB) of the College of Health Sciences of Addis Ababa University, with an IRB protocol number of 068/16/SPH and meeting number of 001/2917. Written permission letters were obtained from Regional, Zonal and District Health Offices of Amhara region. Informed verbal consent was obtained from all study respondents after the purpose, risk, benefit, confidentiality, and their degree of involvement were fully explained to parents or caregivers by their local language and then data collectors signed on the consent form to indicate respondent's agreement to start the interview. Children with MUAC <11.0cm or presence of edema were linked to OTP as this was the currently used admission criteria to therapeutic care. Nutrition education was given to all respondents after interview.

## Results

### Background characteristics

Among 1,290 respondents, 1,273 (445 cases & 828 controls) were interviewed providing a 97.8% overall response rate (100% for cases and 94.7% for the controls). All respondents were female, rural dwellers and Amhara in ethnicity. Respondent mean ( $\pm$ SD) age in years was 29.9 ( $\pm$ 6.8) for cases and 28.9 ( $\pm$ 6.6) for controls, respectively. Regarding child related variables, the mean age was 23.1 ( $\pm$  9.1) months for the cases and 23.1( $\pm$  9.8) for the controls and also more

**Table 1. Background characteristics of mothers and children age 6–59 months following recovery from CMAM, in South Gondar Amhara Region, Ethiopia, 2011/17/18 (n = 1273).**

| Variables                                            | Cases, # (%) | Controls, # (%) |
|------------------------------------------------------|--------------|-----------------|
| HH head (male)                                       | 416 (93.5)   | 768 (92.8)      |
| Age of HH head in years (mean $\pm$ SD)              | 37.8 (8.4)   | 36.0 (8.3)      |
| Age of respondent in years (mean $\pm$ SD)           | 29.9 (6.8)   | 28.9 (6.6)      |
| 15–19                                                | 15 (3.4)     | 35 (4.2)        |
| 20–29                                                | 174 (39.1)   | 403 (48.7)      |
| 30–39                                                | 214 (48.1)   | 314 (37.9)      |
| 40+                                                  | 42 (9.4)     | 76 (9.2)        |
| Age of children                                      | 23.1(9.1)    | 23.1 (8.9)      |
| 6–11                                                 | 20 (4.5)     | 30 (3.6)        |
| 12–23                                                | 250 (56.2)   | 439 (53.0)      |
| 24–35                                                | 119 (26.7)   | 268 (32.4)      |
| 36–47                                                | 42 (9.4)     | 67 (8.1)        |
| 48–59                                                | 14 (3.1)     | 24 (2.9)        |
| Child sex (Male)                                     | 268 (60.2)   | 412 (49.8)      |
| Place of district                                    |              |                 |
| Ebnat                                                | 244 (54.8)   | 368 (44.4)      |
| Tach-Gayint                                          | 171 (38.4)   | 314(37.9)       |
| Lay-Gayint                                           | 30 (6.7)     | 146 (17.6)      |
| Religion (Orthodox Christians)                       | 407 (91.5)   | 786 (94.9)      |
| Respondent occupation (farming)                      | 415(93.3)    | 773(93.4)       |
| Marital status (currently married)                   | 417 (93.7)   | 768 (92.8)      |
| Respondent education status (unable to read & write) | 293 (65.8)   | 475 (57.4)      |
| Partner education status (unable to read & write)    | 234 (56.1)   | 380 (45.9)      |
| Partner occupation (n = 1185) (farming)              | 402 (96.4)   | 735 (95.7)      |
| HH family size (> = 5)                               | 268 (60.2)   | 447 (54.0)      |
| HH under five children (2+)                          | 131 (29.4)   | 197 (23.8)      |
| Decision maker on expenditure (both husband & wife)  | 166 (37.3)   | 346 (41.8)      |
| HH own farm animals                                  | 416 (93.5)   | 752(90.8)       |
| HH own farmland                                      | 417 (93.7)   | 779 (94.1)      |
| Own at least one HH effects (Yes)                    | 233 (52.4)   | 491(59.3)       |
| HH food secure (yes)                                 | 284 (63.8)   | 668 (80.7)      |
| HH currently on food Aid                             | 136 (30.6)   | 207 (25.0)      |
| Attend ANC (Yes)                                     | 348 (78.2)   | 673 (81.3)      |
| Place of delivery (Home)                             | 162 (36.4)   | 293 (35.4)      |
| Consume extra food during pregnancy/lactation (yes)  | 242 (54.4)   | 559 (67.5)      |
| Currently on family planning                         | 314 (70.6)   | 625 (75.5)      |
| <i>Key: HH (household, ANC (Antenatal Care)</i>      |              |                 |

<https://doi.org/10.1371/journal.pone.0231524.t001>

than half (56% cases and 53% controls) were in the age range of 12–23 months. Nearly 2/3<sup>rd</sup> (60%) and half (50%) of children from the cases and controls were male children. About 66% and 57% of the respondents were unable to read and write for cases and controls, respectively. About 80% and 84% respectively of the cases and the controls were farmers by occupation. From the total 445 cases, 155 were SAM and the remaining 290 were MAM cases (See [Table 1](#))

### Child feeding/caring, housing condition & related characteristics

Nearly two third of respondents reportedly (61% for the cases and 66% for the controls) initiated breast feeding immediately within one hour after birth. Prolactal feeding was practiced more among the cases than the controls (9.4% vs.3.6%). More than half (51% cases and 54% controls) of respondent households' water source was improved. About 64% of the cases and 81% of the controls were given vitamin A in the 6-month preceding the survey and also 53 to 54% of children both from the cases and controls were discharged recovered within the last 4–6 months, with an average of 5.2 months since exit from CMAM as recovered (see [Table 2](#)).

**Table 2. Child feeding/caring and housing condition of mothers of recovered children age 6–59 months in South Gondar Zone, Amhara region, Ethiopia, 2017/18, n = 1273).**

| Variables                                                   | Cases, # (%) | Controls, # (%) |
|-------------------------------------------------------------|--------------|-----------------|
| Timely BF initiation (Within 1 hr. of birth)                | 272 (61.1)   | 550 (66.4)      |
| Colostrum given (Yes)                                       | 304 (68.3)   | 639 (77.2)      |
| Practiced prolactal feeding (Yes)                           | 42 (9.4)     | 30 (3.6)        |
| Currently on breast feeding (Yes)                           | 370 (83.1)   | 689 (83.2)      |
| Frequency of BF/day (including night)                       |              |                 |
| 8–12                                                        | 88 (19.8)    | 117(14.1)       |
| <8                                                          | 28 (6.3)     | 42 (5.1)        |
| As long as child needs                                      | 305 (68.5)   | 623 (75.2)      |
| Don't remember/don't know                                   | 24 (5.4)     | 46 (5.6)        |
| Prepare food separately for children from family diet (Yes) | 216 (48.5)   | 543 (65.6)      |
| Trained on child food preparation (Yes)                     | 195 (43.8)   | 507 (61.2)      |
| HH latrine type (Pit with or without a slab)                | 379 (85.2)   | 725 (87.6)      |
| HH water source (Improved)                                  | 226 (50.8)   | 449 (54.2)      |
| Time to water source (< = 15 minute)                        | 59 (13.3)    | 182 (22.0)      |
| Hand washing practice (Good)                                | 220 (49.4)   | 469 (56.6)      |
| Often wash hands with (Soap/ash)                            | 182 (40.9)   | 406 (49.0)      |
| HH dry waste disposal (Open filed)                          | 273 (61.3)   | 413 (49.9)      |
| Child feces disposal (Open field)                           | 190 (42.7)   | 369 (44.6)      |
| Duration after recovery in month (Mean ± SD)                | 5.3 (2.4)    | 5.1(2.3)        |
| ≤3                                                          | 117 (26.3)   | 227 (27.4)      |
| 4–6                                                         | 215 (48.3)   | 425 (51.3)      |
| ≥7                                                          | 113 (25.4)   | 176 (21.3)      |
| Another HH child currently being treated for SAM (Yes)      | 19 (4.3)     | 17 (2.1)        |
| De-worming tablet given in last 6 months (Yes)              | 87 (19.6)    | 191 (23.1)      |
| Vitamin A supplementation in the past 6 months (Yes)        | 286 (64.3)   | 669 (80.8)      |
| Vaccinated for measles (Yes)                                | 420 (94.4)   | 795 (96.0)      |
| Illness history (Diarrhea, fever, cough) in last 2 wks.     | 68 (15.3)    | 129 (15.6)      |
| Treatment stay in week (Mean ± SD)                          | 7.9 (1.9)    | 8.1 (1.6)       |
| < 8.0                                                       | 210 (47.2)   | 290 (35.0)      |
| ≥8.0                                                        | 235 (52.8)   | 538(65.0)       |

<https://doi.org/10.1371/journal.pone.0231524.t002>



## Factors associated with acute malnutrition following discharge as recovered from CMAM program

Variables were checked whether they were factors associated with post-discharge relapse of acute malnutrition following discharge as recovered from CMAMA program using bivariate logistic regression model and a total of 24 candidate variables with P value <0.05 were identified and entered in to the multivariate regression model to control confounding. Eleven variables retain their statistical significance when entered in to the final regression model.

The model goodness of fit was tested using Hosmer Lemeshow;  $X^2$  (8, n = 1273) = 10.801, P. value = 0.213, indicating good model fit. In addition, multicollinearity was checked using the standard error (SE) values of variables and were in the range of 0.126 to 0.358 indicating no multicollinearity.

The odds of relapse of acute malnutrition were 1.7 times higher among male children (AOR = 1.75; 95% CI: 1.36–2.25); 2 times higher among those who had received pre-lacteal feeding (AOR = 2.36; 95% CI:1.38–4.02); 2 times higher in those residing in Ebnat district (AOR = 1.90; 95% CI: 1.19–3.02); 1.5 times higher among children in food insecure HH (AOR = 1.48; 95% CI:1.11–1.99), and almost 2 times higher among children not given vitamin A supplement (AOR = 1.98; 95% CI: 1.47–2.65) see [Table 3](#) below for further detail).

## Discussion

In the current study, children were assessed after an average of 5.2 months of recovery and ten variables were identified as being associated with relapse of acute malnutrition (child sex, district of residence, HH food security status, pre-lacteal feeding, Vitamin A supplementation, consumption of extra food during this pregnancy/lactation, time to water source, another HH child on SAM therapy, frequency of hand washing and age of respondents in years)

The odds of relapse of acute malnutrition were higher among male than female children. This finding was in line with studies conducted in rural Southern Malawi [21], rural Malawi [32], in Sierra Leone [33] and in Zambia [34]. One possible reason for this disparity could be the typical activities of boys in the region to be away from the home performing tasks related to pastoral agriculture, leading potentially to missed meals. A recent study has also noted that boys health may be more influenced by environmental stressor and diarrhea [35].

The odds of relapse were higher among children not given Vitamin A in the 6 months preceding the survey than among those who received Vitamin A supplement. This finding may indicate low receipt of, or access to nutrition services, such as distribution of Vitamin A capsules and was in agreement with a studies conducted in Hawassa, and Afar region, Ethiopia [36, 37]. This could also potentially reflect the role of Vitamin A in promoting and regulating activities in both the innate and adaptive immune system [38], therefore enhancing immune function [39] and is in line with the rationale for recommended supplementation every 6 months [8, 40]. In addition, keeping high risk children in the CMAM program for a longer period and also linking them to supplementary feeding program could also help in reducing relapse [21, 32, 41].

In the current study, children who were given pre-lacteal feeding were more acutely malnourished than those who were not. This finding affirms those in other studies conducted in India and in Dollo Ado district of Somali Region Ethiopia reporting that families which practiced pre-lacteal feeding had more acutely malnourished children [42–44]. This finding relates to the introduction of pre-lacteal feeds which disrupts the feeding of colostrum, practice of EBF, and the increases likelihood of other foods being introduced before 6 months as has been reported in Amhara Region Ethiopia [45, 46]. This practice is likely to result in enteric infections and environmental enteropathy due to consuming of unsafe water or liquids,

**Table 3. Factors associated with relapse of relapse of acute malnutrition among children age 6–59 months following discharge as recovered from CMAM in South Gondar Zone Amhara region Ethiopia, 2017/18 (n = 1273).**

| Variable (final regression)                       | Response category | Wasting |          | 95% C. I         |         |                  |         |
|---------------------------------------------------|-------------------|---------|----------|------------------|---------|------------------|---------|
|                                                   |                   | Cases   | Controls | Crude OR         | P value | Adjusted OR      | P value |
| Child Sex                                         | Male              | 268     | 412      | 1.53 (1.21–1.93) | <0.001  | 1.75 (1.36–2.25) | 0.0001  |
|                                                   | Female            | 177     | 416      | 1                |         | 1                |         |
| Vitamin A supplemented                            | No/Don't know     | 159     | 159      | 2.34(1.80–3.03)  | <0.001  | 1.98 (1.47–2.65) | 0.001   |
|                                                   | Yes               | 286     | 669      | 1                |         | 1                |         |
| HH food security status                           | Insecure          | 161     | 160      | 2.37 (1.83–3.07) | <0.001  | 1.48 (1.11–1.99) | 0.009   |
|                                                   | Secure            | 284     | 668      | 1                |         | 1                |         |
| Respondent age                                    | > = 30            | 256     | 390      | 1.52 (1.21–1.92) | <0.001  | 1.41 (1.09–1.83) | 0.009   |
|                                                   | <30               | 189     | 438      | 1                |         | 1                |         |
| District of residence                             | Ebnat             | 244     | 368      | 3.23 (2.11–4.94) | <0.001  | 1.90 (1.19–3.02) | 0.007   |
|                                                   | Tach-Gayint       | 171     | 314      | 2.65 (1.72–4.09) | <0.001  | 1.40 (0.87–2.25) | 0.168   |
|                                                   | Lay Gayint        | 30      | 146      | 1                |         | 1                |         |
| Respondent education status                       | Non formal        | 397     | 663      | 2.06 (1.46–2.91) | <0.001  | 1.42 (0.96–2.10) | 0.075   |
|                                                   | Formal            | 48      | 165      | 1                |         | 1                |         |
| Pre-lacteal fed                                   | Yes               | 42      | 30       | 2.77 (1.71–4.50) | <0.001  | 2.36(1.38–4.02)) | 0.002   |
|                                                   | No                | 403     | 798      | 1                |         | 1                |         |
| Colostrum fed                                     | No/not sure       | 141     | 189      | 1.57(1.21–2.03)  | 0.001   | 1.25 (0.93–1.68) | 0.141   |
|                                                   | Yes               | 304     | 639      | 1                |         | 1                |         |
| Religion                                          | Muslim            | 38      | 42       | 1.75 (1.11–2.75) | 0.015   | 1.44 (0.85–2.46) | 0.180   |
|                                                   | Orthodox          | 407     | 786      | 1                |         | 1                |         |
| Trained in child food preparation                 | No                | 250     | 321      | 2.03 (1.60–2.56) | 0.001   | 1.16 (0.85–1.58) | 0.343   |
|                                                   | Yes               | 195     | 507      | 1                |         | 1                |         |
| Hand washing practices                            | Poor              | 225     | 359      | 1.34 (1.06–1.68) | 0.014   | 1.33 (1.04–1.70) | 0.024   |
|                                                   | Good              | 220     | 469      | 1                |         | 1                |         |
| HH dry waste disposal                             | Open field/bush   | 273     | 413      | 1.60 (1.26–20.2) | <0.001  | 1.15 (0.85–1.55) | 0.370   |
|                                                   | Put pit/burn      | 172     | 415      | 1                |         | 1                |         |
| Additional fed during pregnancy/ lactation        | No                | 203     | 269      | 1.74(1.38–2.21)  | <0.001  | 1.35 (1.04–1.75) | 0.026   |
|                                                   | Yes               | 242     | 559      | 1                |         | 1                |         |
| Another HH child currently on SAM therapy         | Yes               | 19      | 17       | 2.13 (1.09–4.14) | 0.023   | 2.16(1.07–4.35)  | 0.032   |
|                                                   | No                | 426     | 811      | 1                |         | 1                |         |
| Time to drinking water source in minute walk      | >15/don't know    | 386     | 646      | 1.84 (1.34–2.54) | <0.001  | 1.72 (1.22–2.42) | 0.002   |
|                                                   | ≤15               | 59      | 182      | 1                |         | 1                |         |
| Treatment stay in weeks                           | <8                | 210     | 290      | 1.66 (1.31–2.10) | <0.001  | 1.44 (1.12–1.86) | 0.005   |
|                                                   | ≥8                | 235     | 538      | 1                |         | 1                |         |
| Own at least one HH effects                       | No                | 212     | 336      | 1.33 (1.06–1.68) | 0.015   | 1.01 (0.77–1.33) | 0.941   |
|                                                   | Yes               | 233     | 492      | 1                |         | 1                |         |
| HH family size                                    | ≥5                | 268     | 447      | 1.29 (1.02–1.63) | 0.033   | 1.04 (0.76–1.42) | 0.818   |
|                                                   | <5                | 177     | 381      | 1                |         | 1                |         |
| Often wash hands with                             | Water only        | 263     | 422      | 1.39 (1.10–1.76) | 0.006   | 1.04 (0.77–1.40) | 0.808   |
|                                                   | Soap/ash          | 182     | 406      | 1                |         | 1                |         |
| HH currently on food aid                          | Yes               | 136     | 207      | 1.32 (1.02–1.71) | 0.033   | 1.05 (0.77–1.43) | 0.778   |
|                                                   | No                | 309     | 621      | 1                |         | 1                |         |
| Prepare food to child separately from family diet | No                | 229     | 285      | 2.02 (1.60–2.55) | <0.001  | 0.94 (0.63–1.41) | 0.775   |
|                                                   | Yes               | 216     | 543      | 1                |         | 1                |         |
| HH head age in yrs.                               | ≥36               | 235     | 364      | 1.43 (1.13–1.80) | 0.003   | 0.91 (0.63–1.30) | 0.597   |
|                                                   | <36               | 210     | 464      | 1                |         | 1                |         |
| HH Under five children                            | 2 or more         | 131     | 197      | 1.34 (1.03–1.73) | 0.028   | 1.19 (0.89–1.59) | 0.239   |
|                                                   | 1                 | 314     | 631      | 1                |         | 1                |         |

<https://doi.org/10.1371/journal.pone.0231524.t003>

emphasizing the need to counsel families on prompt initiation and exclusive breastfeeding [47], while supporting changing norms, as well as provision of appropriate counseling not to provide water [48] due to risks associated [49].

In the current study, place of residence (district) was associated with relapse of acute malnutrition. Topographically, Lay Gayint is one of the highland and mountainous areas in the Zone, while Ebnat is more lowland but both districts are drought-prone and rural. Children who lived in Ebnat district were more acutely malnourished compared to those who lived in Lay Gayint district. This could be due to the difference in the exposure to infectious diseases such as malaria as it is common in lowland than in highland area and children infected with malaria were found more acutely malnourished than non-exposed children [50]. This could be related also to differences in HH food security status, hand washing practices, and access to water source in the districts. In the current study, more than half (54.7%) of food insecure HHs, of which 87.5% (49/56) were considered severely insecure were located in Ebnat, and nearly half (47.3%) of respondents who had poor hand washing practices and 48.8% of Households whose water source was longer than a 15-minute walk were at Ebnat district. Geographic variation has also been noted in Bangladesh stating that more acutely malnourished children were located in the Eastern versus the Southern district [51], as well as in Sylhet versus Dhaka division [52], and in Northern provinces of Zambia versus in the Western provinces [34].

As might be expected relapse of acute malnutrition after discharge as recovered was also related to HH food security status generally. The odds of relapse among children in food insecure HHs was higher than in food secure HHs. The finding was in agreement with studies conducted in India [25], Nigeria [53] and Ethiopia [36]. Food insecurity can be linked to inadequate intake of diversified foods and studies have reported consumption of low dietary diversity food as being associated with acute malnutrition [54, 55]. Other studies pointed to the role of low socioeconomic status or monthly income in food insecurity [56–59] which directly or indirectly reduces the HH purchasing power, and thus, reduces access to food.

Having another family member currently on SAM therapy increased the likelihood of being more acutely malnourished. In the current study, children in food-insecure households were more acutely malnourished than their counterparts, a finding supported by results of other recent studies [25, 53]. Low HH socioeconomic status could contribute to children to being acutely malnourished [56, 57] which in turn may lead HHs to feed children less diversified diets [54, 55]. In the current study, 1.1% of respondents reported sharing therapeutic food with other children in the family and 1.2% reported knowing other households which had done so. Sharing therapeutic food could make it more likely that a recovered malnourished child could relapse. As reported by Concern Worldwide, some children at feeding centers have been kept in the programme longer than the required duration due to therapeutic food sharing with other children [60]. Also in India, it was reported that although Balbhog (Energy Dense Micronutrient Fortified Extruded Blended Food) was provided as supplementary nutrition, it was also shared with other family members [61].

The odds of relapse were higher among children whose mother reported not consuming additional food during this pregnancy/lactation. International recommendations for pregnant and lactating women include additional daily food consumption to meet extra caloric needs [62]. Our finding echoes research indicating that undernourished (BMI < 18.5) mothers are more likely to have undernourished children [51, 57, 63–65]. Finding have also been reported that pregnant mothers with high dietary diversity scores have improved gestational weight gain [66].

In the current study, children in a HH with access to drinking water within 15-minutes walking distance were less acutely malnourished than those whose access to drinking water was greater than 15-minutes walking distance or more. This finding is similar to that of a

study done in Dollo Ado district, Somali region, Ethiopia [42]. Those with a shorter walking distance were less acutely malnourished compared to those with a walking distance of greater than 60 minutes [67]. As reported by Pickering and Davis, if the water source is far from home, then mothers will need to spend significantly more time fetching water, and thereby have less time to care for children [68]. This association could also be linked with the well-known relationship between better water, sanitation and hygiene access with improved nutrition outcomes [69].

The World Health Organization (WHO) recommends that for optimal health outcomes families should wash hands at four key time points/critical periods: before eating, before preparing food, after defecation, and after disposal of child feces to prevent infection and malnutrition [69]. In the current study, the odds of acute malnutrition were higher among children whose mothers had practiced hand washing only after one or two of the key points compared to those who wash hands frequently (three or more of the hand washing time points). These findings of a relationship between adherence to hand washing practices are similar to those from studies in Bangladesh, Chad, and Ethiopia where caregivers who washed hands regularly were less likely to have acutely malnourished children [55, 70–72]. Per the principle of infection malnutrition cycle, if a mother washes her hands at the critical points, then the risk of contamination by excreta and the transmission of the pathogens is prevented, along with nutritional deficiencies [73].

Age of the index child's mother was also a factor associated with post-discharge relapse, with children whose mother was above 30 years were being more likely to be malnourished. A study in Nepal also identified an association between acutely malnourished children and mothers aged above 35 years [74]. This could be due to the fact that as the age of the mother increases, the number of pregnancies could increase and, if the spacing between pregnancies was close; her nutritional resources are more depleted. This link was supported by a recent study conducted in Ethiopia stating that the risk of children being acutely malnourished decreases as birth intervals increases ( $> = 24$  months) [75].

According to the current CMAM protocol, the length of treatment stay at OTP is expected to be  $< 8$  weeks, otherwise considered as poor performance [13] but in the current study, children who were discharged as recovered within 8 weeks of admission to OTP were found more acutely malnourished compared with children discharged after 8 weeks. This could be because, they were discharged as long as they achieve 15% weight gain [13] but may not be fully recovered. A study in Sudan indicated the disadvantage of using 15% target weight gain discharge criteria compared with MUAC describing the benefit that use of  $MUAC \geq 125$  mm as discharge criteria gave children longer duration of treatment stay and a higher percent weight gain [76]. A study in Southern Ethiopia has indicated that 9% of discharge as recovered children based on 15% weight gain were still moderately or severely wasted [77]. Another study based on 15% weight gain discharge criteria also reported a high prevalence of SAM (34.6%), 14 weeks following discharge [22].

### Strengths and limitations

The study is the first study among children successfully discharged recovered from CMAM in the study area to identify key associated factors with post-discharge relapse of acute malnutrition; such information will help program managers and nutrition focal persons to address acute malnutrition. This study however has limitations: The cases and controls were identified using MUAC only and not using both MUAC and WHZ as the two indicators could identify relapsed cases differently. The factors associated with relapse of acute malnutrition “provision of colostrum, Vitamin A supplementation, and distance from water sources” need to be

interpreted cautiously as the responses “don’t know, not sure, and/or don’t remember” were classified as “no” assuming that children were not given colostrum, Vitamin A, and/or distance to water source was more than a 15minute walk. Food insecurity status could be underestimated as the data collection time was in the harvest season (October 2017 to January 2018).

## Conclusion and recommendation

Several risk factors were associated with relapse of acute malnutrition following recovery (sex of the child, place of residence, food security status, pre-lacteal feeding, caretaker hand washing practices, receipt of Vitamin A supplementation, household access to water source, maternal consumption of additional food during pregnancy/lactation, age of the mother, length of treatment stay, and presence of another child in the household receiving nutritional therapy). Understanding these factors may lead to the ability to predict and prevent future post discharge relapse of acute malnutrition. WASH and prelacteal feeding practices were among the drivers of optimizing child nutrition conditions following recovery, therefore, improvements in caregiving practice with mothers being the critical entry point for behavior change should be one priority interventions along with CMAM program. In addition, household food insecurity interventions through public Safety Net programs should be strengthened.

## Supporting information

**S1 Data.**  
(SAV)

## Acknowledgments

Our appreciation goes to the Amhara Regional Health Bureau, South Gondar Zone Health Department, and all three district health office heads & nutrition focal persons. We also especially thank study participants, data collectors, supervisors.

## Author Contributions

**Conceptualization:** Dereje Birhanu Abitew, Alemayehu Worku Yalew, Afework Mulugeta Bezabih.

**Funding acquisition:** Dereje Birhanu Abitew, Alemayehu Worku Yalew, Afework Mulugeta Bezabih.

**Investigation:** Dereje Birhanu Abitew.

**Methodology:** Dereje Birhanu Abitew, Alemayehu Worku Yalew, Afework Mulugeta Bezabih, Alessandra N. Bazzano.

**Resources:** Dereje Birhanu Abitew, Afework Mulugeta Bezabih.

**Validation:** Dereje Birhanu Abitew.

**Writing – original draft:** Dereje Birhanu Abitew.

**Writing – review & editing:** Dereje Birhanu Abitew, Alemayehu Worku Yalew, Afework Mulugeta Bezabih, Alessandra N. Bazzano.

## References

1. WHO (1999). "Management of severe Malnutrition: A manual for physicians And other senior health Workers."

2. UNICEF, et al. (2010). Facts for Life, Fourth edition.
3. WHO and UNICEF (2009). WHO Child growth standards and the identification of severe acute malnutrition in infants and children, A Joint statement by the World Health Organization and the United Nations Children's Fund; World Health Organization Press: Geneva, Switzerland.
4. WHO (2013). Updates on the Management of Severe Acute Malnutrition in Infants and Children. World Health Organization: Geneva, Switzerland.
5. UNICEF, et al. (2019). "Levels and trends in child malnutrition UNICEF / WHO / World Bank Group Joint Child Malnutrition Estimates Key findings of the 2019 edition".
6. EDHS (2016). Ethiopia Demographic and Health Survey, Addis Ababa, Ethiopia. Demographic and health survey, ICF Macro Calverton, Maryland, USA.
7. WHO, et al. (2007). Community-based management of severe acute malnutrition; A Joint Statement by the World Health Organization, the World Food Programme, the United Nations System Standing Committee on Nutrition and the United Nations Children's Fund; World Health Organization: Geneva, Switzerland.
8. WHO (2013). Essential nutrition actions: improving maternal, newborn, infant and young child health and nutrition. PMID: [25473713](https://pubmed.ncbi.nlm.nih.gov/25473713/)
9. Todd B., et al. (2005). An assessment of the causes of malnutrition in Ethiopia, A contribution to the formulation of a National Nutrition Strategy for Ethiopia.
10. Bhutta Z. A., et al. (2013). "Evidence-based interventions for improvement of maternal and child nutrition: what can be done and at what cost?" *The Lancet* 382(9890): 452–477.
11. Collins S. and Yates R. (2003). "The Need to Update the Classification of Acute Malnutrition." [Letter] 362((9379)).
12. Sphere-Project (2011). The Sphere project, Humanitarian Charter and Minimum Standards in Humanitarian Response [www.sphereproject.org](http://www.sphereproject.org).
13. FMOH (2007). Protocol for the management of severe acute malnutrition, Federal Ministry of Health, Ethiopia.
14. Valid-International and Concern-Worldwide (2006). CTC Research and Development programme, Community-based Therapeutic Care, by Valid International and Concern Worldwide. Field Manual, First Edition.
15. Sphere-handbook (2018). Sphere Handbook: Humanitarian Charter and Minimum Standards in Humanitarian Response, PRACTICAL ACTION.
16. Steve c and Kate S.(2002). "Outpatient care for severely malnourished children in emergency relief programmes: a retrospective cohort study." *Lancet* 360: 1824–1830. [https://doi.org/10.1016/S0140-6736\(02\)11770-3](https://doi.org/10.1016/S0140-6736(02)11770-3) PMID: [12480359](https://pubmed.ncbi.nlm.nih.gov/12480359/)
17. Collins S. (2007). "Treating severe acute malnutrition seriously." *Arch Dis Child* 92: 453–461. <https://doi.org/10.1136/adc.2006.098327> PMID: [17449529](https://pubmed.ncbi.nlm.nih.gov/17449529/)
18. Efre T., et al. (2010). "Treatment outcome of children with severe acute malnutrition admitted to therapeutic feeding centers in Southern Region of Ethiopia " *Ethiop. J. Health Dev.* 24(3): 234–238.
19. Tekeste A., et al. (2012). "Cost effectiveness of community-based and inpatient therapeutic feeding programs to treat severe acute malnutrition in Ethiopia. <http://www.resource-allocation.com/content/10/1/4>." *Cost Effectiveness and Resource Allocation* 10(4).
20. Banerjee C., et al. (2016). Follow up status of children with SAM treated with RUTF in peri-urban and rural Bangladesh. ENN, Field exchange.
21. Chang C. Y., et al. (2013). "Children Successfully Treated for Moderate Acute Malnutrition Remain at Risk for Malnutrition and Death in the Subsequent Year after Recovery." *J. Nutr.* 143: 215–220. <https://doi.org/10.3945/jn.112.168047> PMID: [23256140](https://pubmed.ncbi.nlm.nih.gov/23256140/)
22. Tadesse E., et al. (2018). "An integrated community-based outpatient therapeutic feeding programme for severe acute malnutrition in rural Southern Ethiopia: Recovery, fatality, and nutritional status after discharge." *Maternal & child nutrition* 14(2): e12519.
23. Ciliberto M. A., et al. (2005). "Comparison of home based therapy with ready to use therapeutic food with standard therapy in the treatment of malnourished Malawian: a controlled clinical effectiveness trial." *Am J Clin Nutr* 81: 864–870. <https://doi.org/10.1093/ajcn/81.4.864> PMID: [15817865](https://pubmed.ncbi.nlm.nih.gov/15817865/)
24. Yassinmè Elysée Somassè, et al. (2015). "Relapses from acute malnutrition and related factors in a community-based management programme in Burkina Faso." *Maternal and child nutrition*: 1–10.
25. Burza S, et al. (2016). "Seasonal effect and long-term nutritional status following exit from a Community-Based Management of Severe Acute Malnutrition program in Bihar, India." *European Journal of clinical nutrition* 70: 437–444.

26. CSA (2013). Federal Democratic Republic of Ethiopia, Central Statistical Agency, Population Projection of Ethiopia for All Regions At Wereda Level from 2014–2017, Addis Ababa, Ethiopia.
27. South-Gondar (2017/18). South Gondar Zone Health Department annual report, Amhara Regional state Ethiopia.
28. FMOH (2013). Training course on the management of severe acute malnutrition, participant manual. Addis Ababa.
29. EDHS (2011). Ethiopia Demographic and Health Survey, Addis Ababa, Ethiopia. Demographic and health survey, ICF Macro Calverton, Maryland, USA.
30. Coates J., et al. (2007). "Food and Nutrition Technical Assistance Project (FANTA): Household Food Insecurity Access Scale (HFIAS) for Measurement of Food Access: Indicator Guide (v. 3)." Washington, DC: Food and Nutrition Technical Assistance Project.
31. WHO (2007). Child growth standard, Department of Nutrition for Health and Development.
32. Trehan Indi, et al. (2015). "Extending Supplementary Feeding for Children Under Five with Moderate Acute Malnutrition Leads to Lower Relapse rates." *J Pediatr Gastroenterol Nutr* 60(4): 544–549. <https://doi.org/10.1097/MPG.0000000000000639> PMID: 25419681
33. Maust A., et al. (2015). "Severe and moderate acute malnutrition can be successfully managed with an integrated protocol in Sierra Leone." *Journal of Nutrition*.
34. Nzala S. H., et al. (2011). "Demographic, cultural and environmental factors associated with frequency and severity of malnutrition among Zambian children less than five years of age." *J Publ Health Epidemiol* 3(8): 362–370.
35. Kumi-Kyereme A. and Amo-Adjei J. (2016). "Household wealth, residential status and the incidence of diarrhoea among children under-five years in Ghana." *Journal of Epidemiology and Global Health* 6(3): 131–140. <https://doi.org/10.1016/j.jegh.2015.05.001> PMID: 26070430
36. Bisrat G. and Kulkarni U. (2017). "Assessment of the Nutritional Status and Associated Factors of Orphans and Vulnerable Preschool Children on Care and Support from Nongovernmental Organizations in Hawassa Town, Southern Ethiopia." *Global Journal of Medical Research*.
37. Seid A., et al. (2017). "Determinants of Acute Malnutrition among Children Aged 6–59 Months in Public Health Facilities of Pastoralist Community, Afar Region, Northeast Ethiopia: A Case Control Study." *Journal of nutrition and metabolism* 2017.
38. Huang Z., et al. (2018). "Role of Vitamin A in the Immune System." *Journal of clinical medicine* 7(9): 258.
39. WFP (2012). Nutrition at the World Food Programme, Programming for Nutrition-Specific Interventions, Fighting Hunger Worldwide, Available at: [www.wfp.org/policy-resources](http://www.wfp.org/policy-resources).
40. WHO (2011). Guideline: Vitamin A supplementation in infants and children 6–59 months of age. Geneva, World Health Organization.
41. James P., et al. (2016). "Children with moderate acute malnutrition with no access to supplementary feeding programmes experience high rates of deterioration and no improvement: results from a prospective cohort study in rural Ethiopia." *PloS one* 11(4): e0153530. <https://doi.org/10.1371/journal.pone.0153530> PMID: 27100177
42. Demissie S. and Worku A. (2013). "Magnitude and Factors Associated with Malnutrition in Children 6–59 Months of Age in Pastoral Community of Dollo Ado District, Somali Region, Ethiopia." *Science Journal of Public Health* 1(4): 175–183.
43. Mishra K., et al. (2014). "Risk factors for severe acute malnutrition in children below 5 y of age in India: a case-control study." *The Indian Journal of Pediatrics* 81(8): 762–765. <https://doi.org/10.1007/s12098-013-1127-3> PMID: 23873300
44. Prashanth M., et al. (2017). "Risk factors for severe acute malnutrition in under-five children attending nutritional rehabilitation centre of tertiary teaching hospital in Karnataka: a case control study." *International Journal of Contemporary Pediatrics* 4(5): 1721–1726.
45. Mekuria G. and Edris M. (2015). "Exclusive breastfeeding and associated factors among mothers in Debre Markos, Northwest Ethiopia: a cross-sectional study." *International breastfeeding journal* 10(1): 1. <https://doi.org/10.1186/s13006-014-0027-0> PMID: 25635183
46. Tewabe T., et al. (2016). "Exclusive breastfeeding practice and associated factors among mothers in Motta town, East Gojjam zone, Amhara Regional State, Ethiopia, 2015: a cross-sectional study." *International breastfeeding journal* 12(1): 12.
47. Sanghvi J., et al. (2014). "Predictors for Weight Gain in Children Treated for Severe Acute Malnutrition: A Prospective Study at Nutritional Rehabilitation Center." *Hindawi Publishing Corporation*http: 1–5.

48. Tongun J. B., et al. (2018). "Prevalence and determinants of pre-lacteal feeding in South Sudan: a community-based survey." *Global health action* 11(1): 1523304. <https://doi.org/10.1080/16549716.2018.1523304> PMID: 30295171
49. Legesse M., et al. (2014). "Prelacteal feeding practices and associated factors among mothers of children aged less than 24 months in Raya Kobo district, North Eastern Ethiopia: a cross-sectional study." *International breastfeeding journal* 9(1): 189. <https://doi.org/10.1186/s13006-014-0025-2> PMID: 25648571
50. Gone T., et al. (2017). "The association between malaria and malnutrition among under-five children in Shashogo District, Southern Ethiopia: a case-control study." *Infectious diseases of poverty* 6(1): 9. <https://doi.org/10.1186/s40249-016-0221-y> PMID: 28081711
51. Chowdhury M. R. K., et al. (2016). "Risk factors for child malnutrition in Bangladesh: A multilevel analysis of a nationwide population-based survey." *The Journal of pediatrics* 172: 194–201. e191. <https://doi.org/10.1016/j.jpeds.2016.01.023> PMID: 26858194
52. Talukder A. (2017). "Factors Associated with Malnutrition among Under-Five Children: Illustration using Bangladesh Demographic and Health Survey, 2014 Data Bangladesh." *Children*, MDPI 4(88).
53. Ajao K., et al. (2010). "Influence of family size, household food security status, and child care practices on the nutritional status of under-five children in Ile-Ife, Nigeria." *African journal of reproductive health* 14(4).
54. Miskir A., et al. (2017). "Determinants of Acute Malnutrition among Under-Five Children in Karat Town Public Health Facilities, Southern Ethiopia: A Case Control Study." *Quality in Primary Care* 25(4): 242–252.
55. Dodos J., et al. (2018). "Individual and household risk factors of severe acute malnutrition among under-five children in Mao, Chad: a matched case-control study." *Archives of Public Health* 76(1): 35.
56. Das S. and Sahoo H. (2011). "An investigation into factors affecting child undernutrition in Madhya Pradesh." *The Anthropologist* 13(3): 227–233.
57. Fuchs C., et al. (2014). "Factors associated with acute malnutrition among children admitted to a diarrhoea treatment facility in Bangladesh." *International journal of pediatrics* 2014.
58. Frozanfar M. K., et al. (2016). "Acute malnutrition among under-five children in Faryab, Afghanistan: prevalence and causes." *Nagoya journal of medical science* 78(1): 41. PMID: 27019527
59. Tsedeke W., et al. (2016). "Prevalence of acute malnutrition (wasting) and associated factors among preschool children aged 36–60 months at Hawassa Zuria, South Ethiopia: a community based cross sectional study." *J Nutr Food Sci* 6(466): 2.
60. Concern-Worldwide (2010). Evaluation of National Community management of acute malnutrition Programme, Ethiopia.
61. Talati Kandarp N, et al. (2016). "Take home ration in ICDS programmes: Opportunities for integration with health system for improved utilization via MAMTA CARD and E-MAMTA, India." *BMJ Glob Health* 1(1).
62. WHO and UNICEF (2003). Global strategy for infant and young child feeding.
63. Rayhan M. I. and Khan M. S. H. (2006). "Factors causing malnutrition among under five children in Bangladesh." *Pak J Nutr* 5(6): 558–562.
64. Gewa C. A. and Yandell N. (2012). "Undernutrition among Kenyan children: contribution of child, maternal and household factors." *Public health nutrition* 15(6): 1029–1038. <https://doi.org/10.1017/S136898001100245X> PMID: 22107729
65. Ambadekar N. and Zodpey S. (2017). "Risk factors for severe acute malnutrition in under-five children: a case-control study in a rural part of India." *Public health* 142: 136–143. <https://doi.org/10.1016/j.puhe.2016.07.018> PMID: 27613225
66. Lama N., et al. (2018). "Determinants of nutritional status of pregnant women attending antenatal care in Western Regional Hospital, Nepal." *International Journal Of Community Medicine And Public Health* 5(12): 5045–5051.
67. van Cooten M. H., et al. (2019). "The association between acute malnutrition and water, sanitation, and hygiene among children aged 6–59 months in rural Ethiopia." *Maternal & child nutrition* 15(1): e12631.
68. Pickering A. J. and Davis J. (2012). "Freshwater availability and water fetching distance affect child health in sub-Saharan Africa." *Environmental science & technology* 46(4): 2391–2397.
69. WHO, et al. (2015). Improving nutrition outcomes with better water, sanitation and hygiene: practical solutions for policies and programmes.
70. Ayana A. B., et al. (2015). "Determinants of acute malnutrition among children aged 6–59 months in public hospitals, Oromia region, West Ethiopia: a case-control study." *BMC Nutrition* 1(1): 34.



71. Abuka T., et al. (2017). "Determinants for Acute Malnutrition among Under-Five Children at Public Health Facilities in Gedeo Zone, Ethiopia: A Case-Control Study." *Pediatr Ther* 7(317): 2161–0665.1000317.
72. Musa M. K., et al. (2017). "Risk factors of severe acute malnutrition among under-five children: a hospital-based study in Bangladesh." *J Med Sci Health* 3: 13–21.
73. Brown J., et al. (2013). "Water, sanitation, hygiene and enteric infections in children." *Archives of disease in childhood* 98(8): 629–634. <https://doi.org/10.1136/archdischild-2011-301528> PMID: 23761692
74. Pravara N. K., et al. (2017). "Determinants of severe acute malnutrition among children under 5 years of age in Nepal: a community-based case–control study." *BMJ open* 7(8): e017084. <https://doi.org/10.1136/bmjopen-2017-017084> PMID: 28851796
75. Eshetu A., et al. (2016). "Determinant of severe acute malnutrition among children aged 6–59 Months in Konso, Southern Ethiopia: Case control study." *Q Prim Care* 24: 181–186.
76. Dale N. M., et al. (2013). "Using mid-upper arm circumference to end treatment of severe acute malnutrition leads to higher weight gains in the most malnourished children." *PloS one* 8(2): e55404. <https://doi.org/10.1371/journal.pone.0055404> PMID: 23418442
77. Forsén E., et al. (2015). "Predicted implications of using percentage weight gain as single discharge criterion in management of acute malnutrition in rural southern E thiopia." *Maternal & child nutrition* 11(4): 962–972.
